# Supplementary material
Source: HighWire-hosted journal article supplement (https://www.annfammed.org/highwire/filestream/8169/field_highwire_adjunct_files/0/Hidalgo_Supp_App_1.pdf)
Supplement: Hidalgo_Supp_App_1.pdf [file Hidalgo_Supp_App_1.pdf]

**Online Supplementary Material**

López-Torres Hidalgo J, Boix Gras C, Téllez Lapeira J, et al. The hearing-dependent daily activities scale to evaluate impact of hearing loss in older people. *Ann Fam Med.* 2008;6(5):441-447.

<http://www.annfammed.org/cgi/content/full/6/5/441/DC1>

**Supplemental Appendix 1. The Hearing-Dependent Daily Activities (HDDA) Scale**

The Hearing-Dependent Daily Activities Scale allows evaluation of the impact of hearing loss in older persons. Next, if you will allow me, I am going to ask you a few questions about your hearing:

| No.                                                                                                                                                        | Questions                                                                                                  | Always             | Occasionally                | Never                          |
|------------------------------------------------------------------------------------------------------------------------------------------------------------|------------------------------------------------------------------------------------------------------------|--------------------|-----------------------------|--------------------------------|
| 1.                                                                                                                                                         | Have you noticed that you don't hear as well as you used to?                                               |                    |                             |                                |
| 2.                                                                                                                                                         | Has anybody told you that you don't hear well?                                                             |                    |                             |                                |
| 3.                                                                                                                                                         | Does your family tell you that you turn up the volume of the television or radio very loudly?              |                    |                             |                                |
| 4.                                                                                                                                                         | When you're talking to someone, do you have to ask the person to speak louder?                             |                    |                             |                                |
| 5.                                                                                                                                                         | When you're talking to someone, do you have to ask the person to repeat what they're saying various times? |                    |                             |                                |
|                                                                                                                                                            |                                                                                                            | <b>No, I Can't</b> | <b>With Some Difficulty</b> | <b>Yes, Without Difficulty</b> |
| 6.                                                                                                                                                         | Can you understand when someone is speaking to you in a low voice?                                         |                    |                             |                                |
| 7.                                                                                                                                                         | Can you understand when someone is speaking to you on the telephone?                                       |                    |                             |                                |
| 8.                                                                                                                                                         | Can you hear the sound of a coin dropping on the floor?                                                    |                    |                             |                                |
| 9.                                                                                                                                                         | Can you hear the sound of a door closing?                                                                  |                    |                             |                                |
| 10.                                                                                                                                                        | Can you hear when someone approaches you from behind?                                                      |                    |                             |                                |
| 11.                                                                                                                                                        | Can you hear when someone is speaking to you in a noisy setting such as a pub or restaurant?               |                    |                             |                                |
| 12.                                                                                                                                                        | Can you hold a conversation in a group setting when several people are speaking at the same time?          |                    |                             |                                |
| Scoring: "always" and "no, I can't" = 0 points; "occasionally" and "with some difficulty" = 1 point; and "never" and "yes, without difficulty" = 2 points. |                                                                                                            |                    |                             |                                |
